# Supplementary material for: A New Methodology for Evaluation of Nematode Viability
Source: Hindawi journal article supplement (doi:10.1155/2015/879263), 2015-01-01

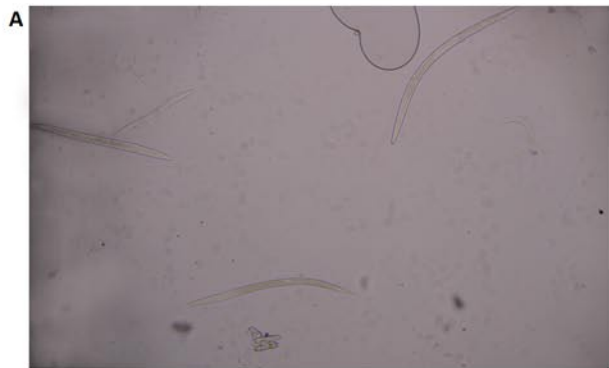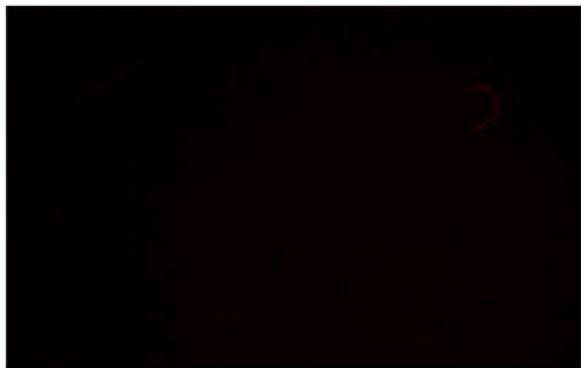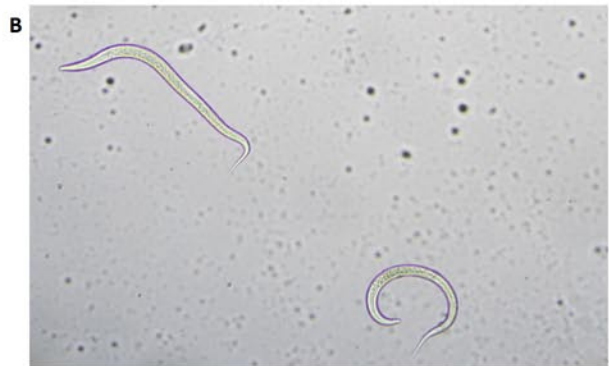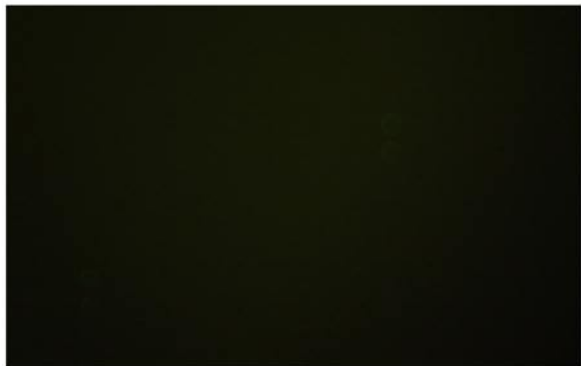

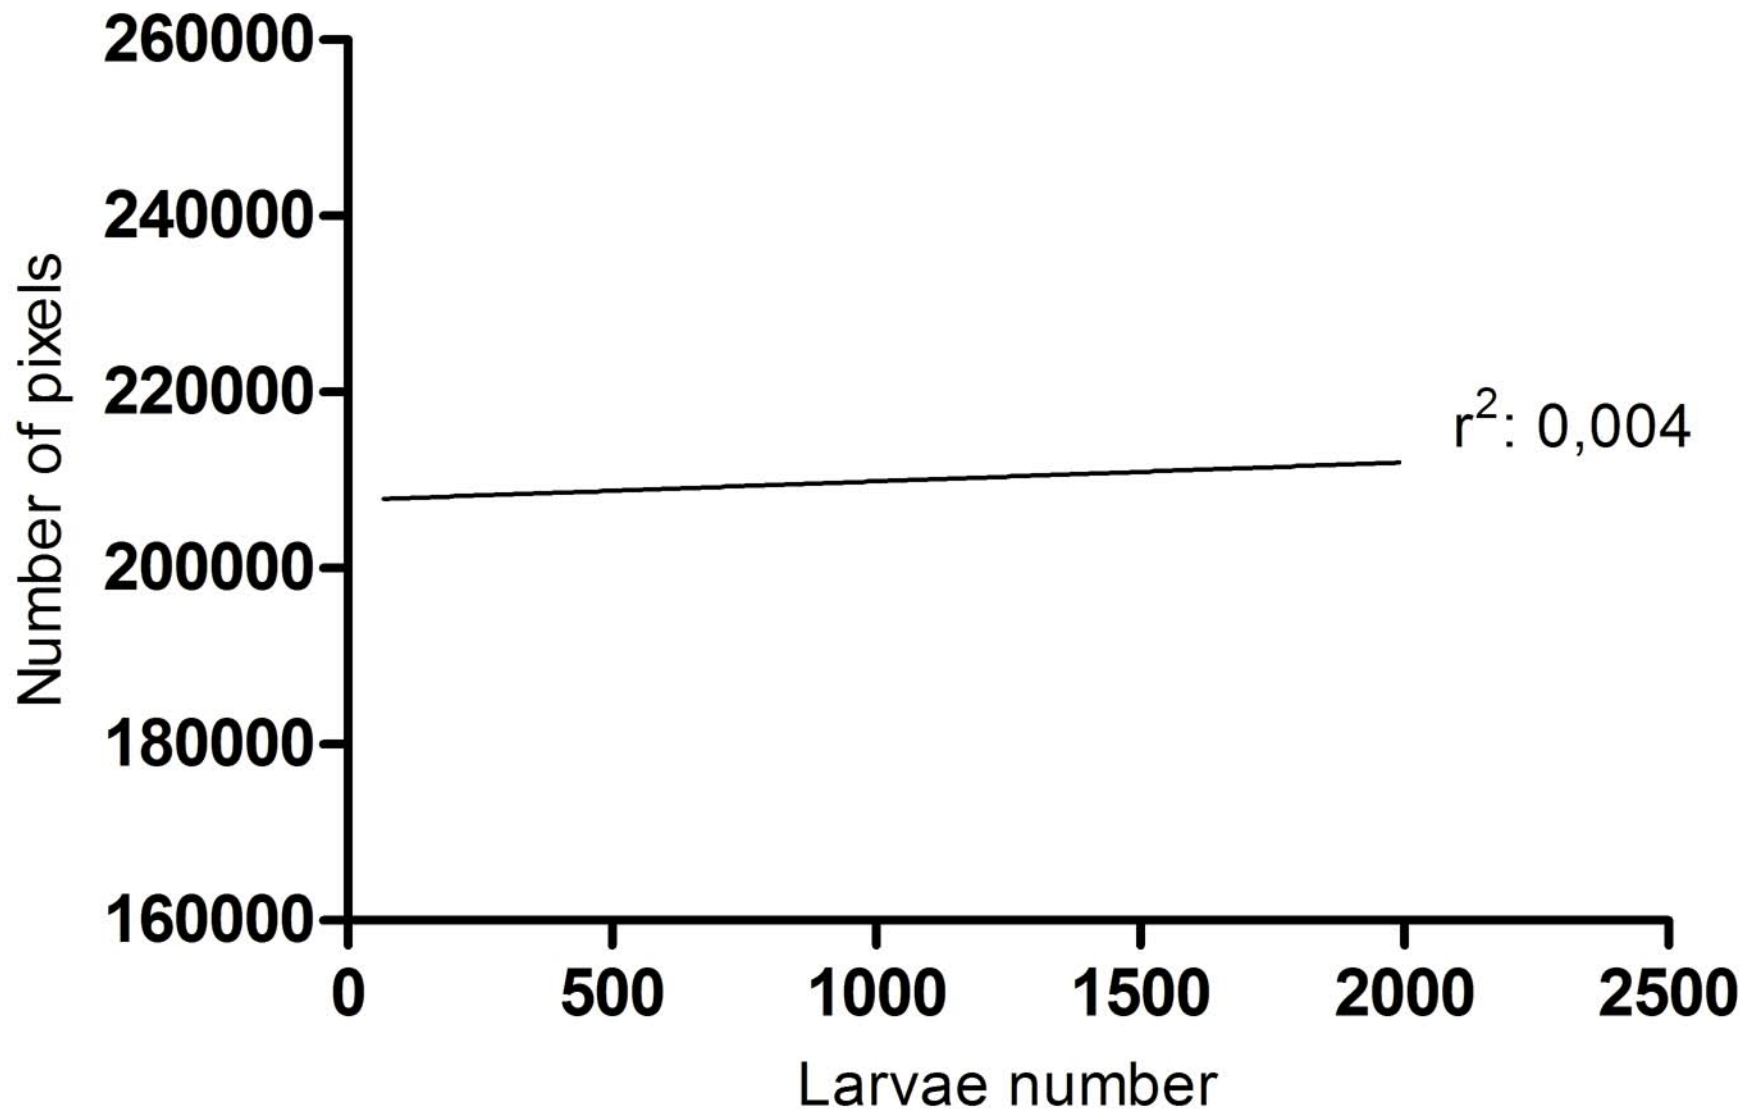

Supplement: f1 [file 879263.f1.pdf]
